# Supplementary material
Source: PubMed Central journal article supplement (PMC4413754)
Supplement: ASN.2014010060_ASN2014010060SupplementaryData.pdf [file ASN.2014010060_ASN2014010060SupplementaryData.pdf]

# Supplemental 1

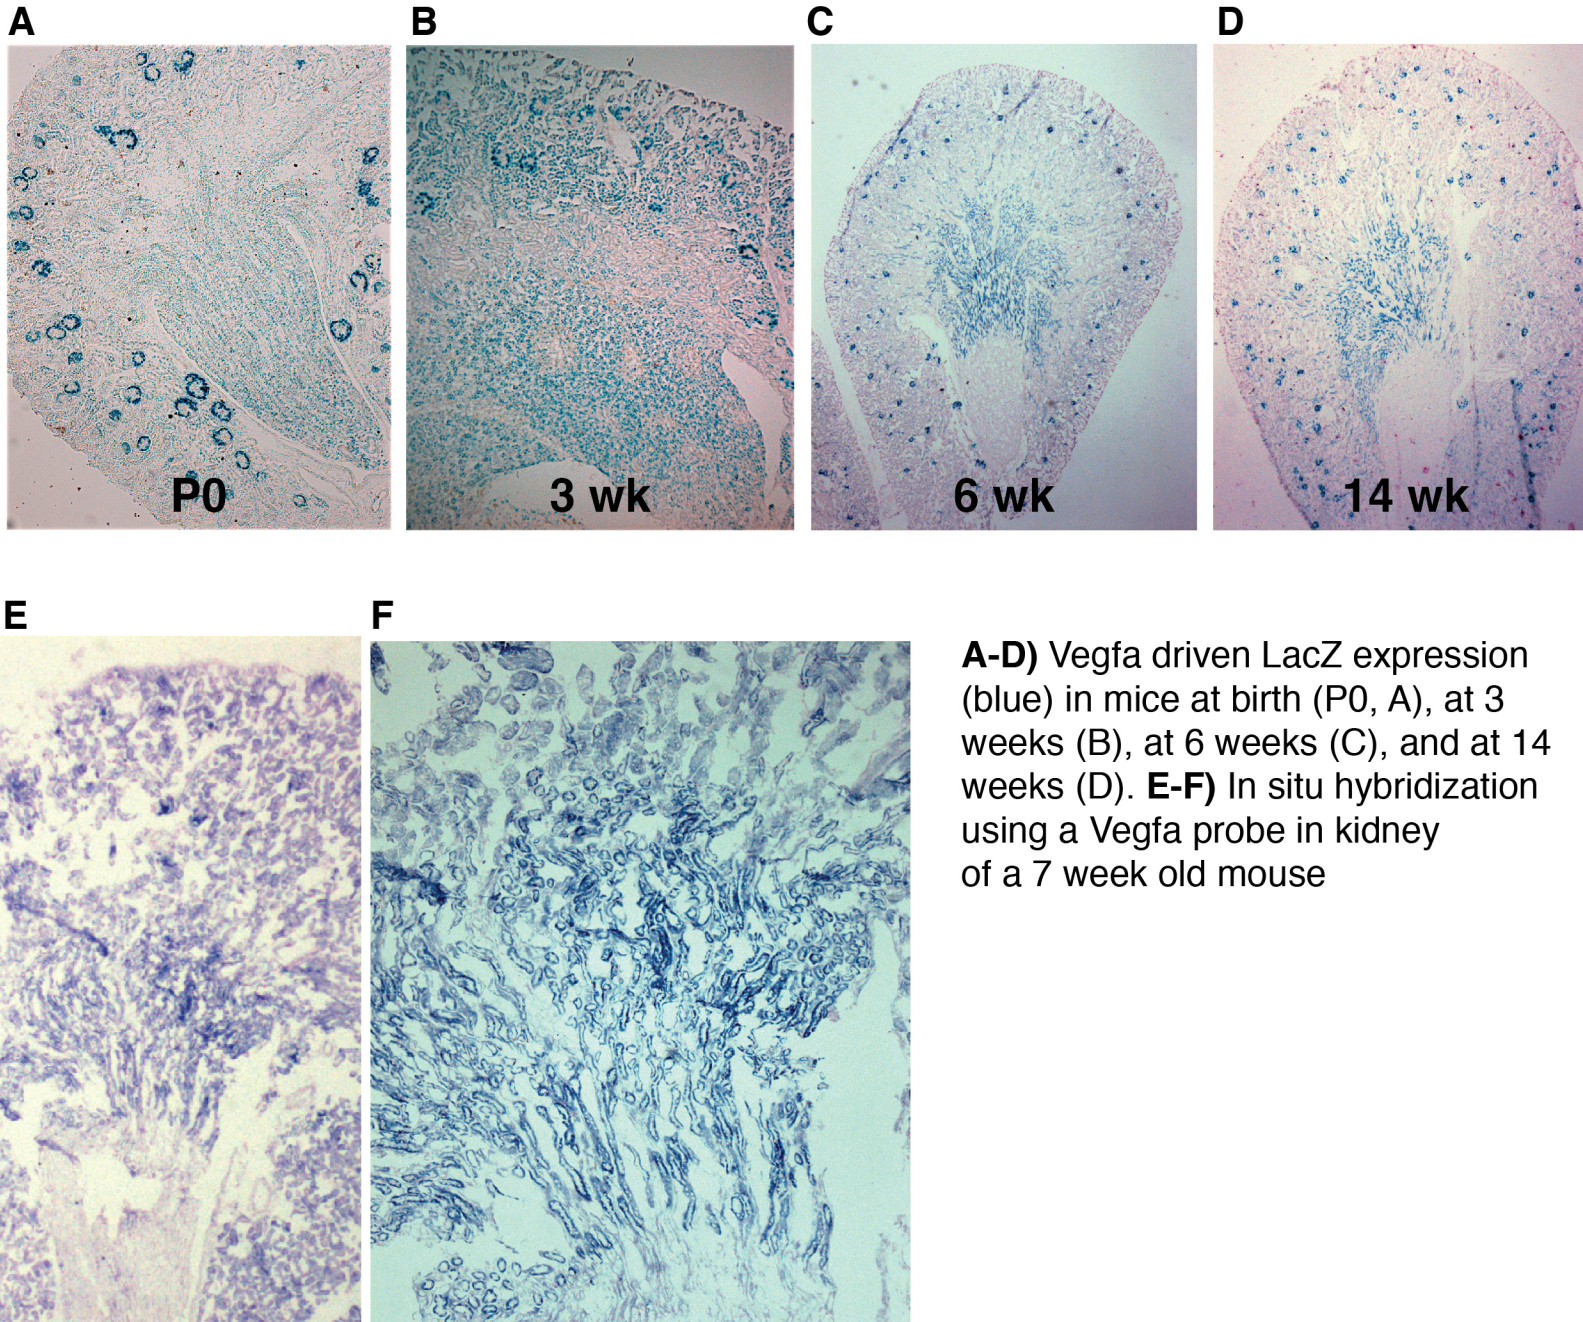

**A-D)** Vegfa driven LacZ expression (blue) in mice at birth (P0, A), at 3 weeks (B), at 6 weeks (C), and at 14 weeks (D). **E-F)** In situ hybridization using a Vegfa probe in kidney of a 7 week old mouse

## Supplemental 2

A

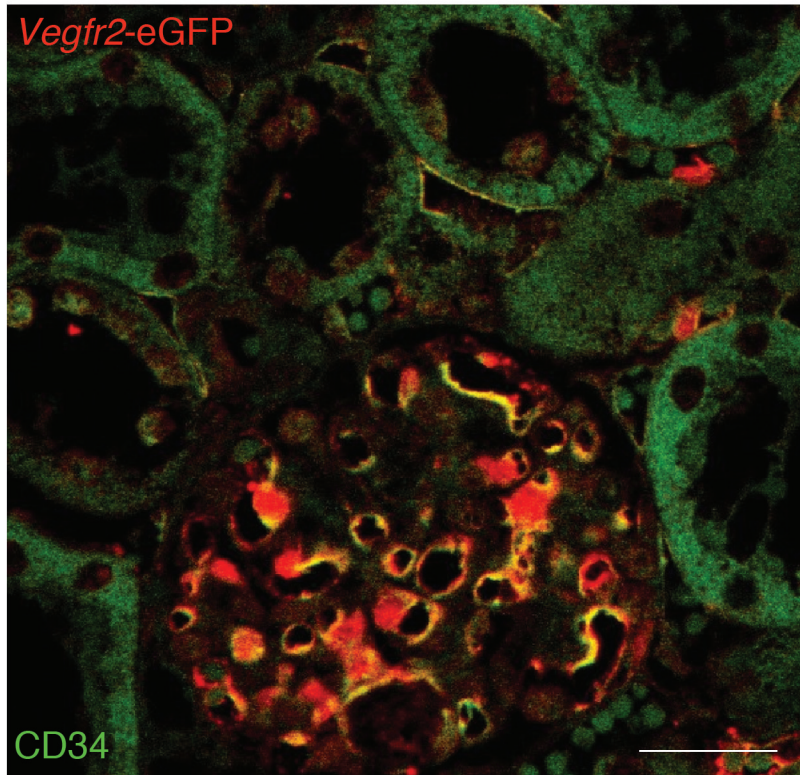

B

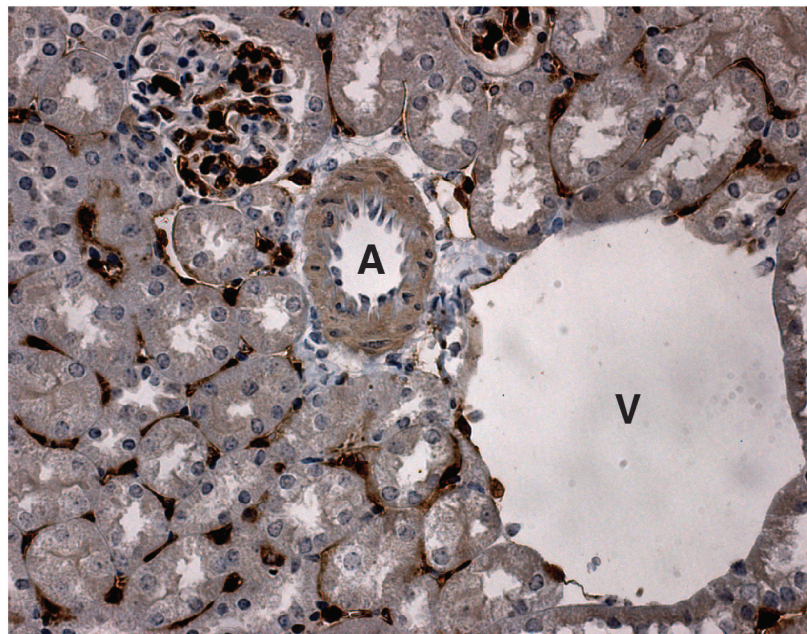

C

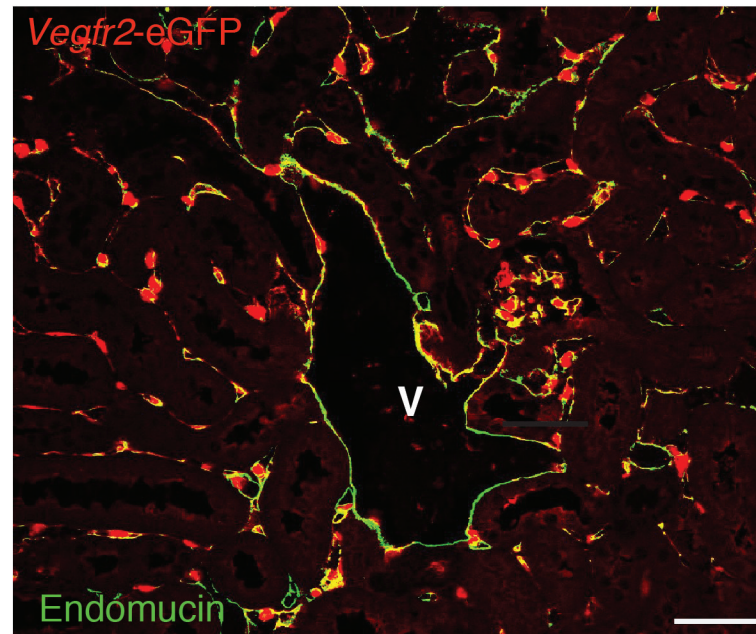

**A)** Immunofluorescence showing localization of *Vegfr2* driven eGFP expression (red) in *Vegfr2*<sup>eGFP/wt</sup> mice to endothelial cells in the glomerular microvasculature also positive for CD34 (green). Scale bar is 23.71  $\mu$ m. **B)** Crosssection of kidney showing localization of *Vegfr2* driven eGFP expression to peritubular cells as well as certain cells within veins (marked V), but not in arteries (A). **C)** Immunofluorescence using antibodies directed against eGFP (red) and Endomucin (green) in *Vegfr2*<sup>eGFP/wt</sup> mice to show localization to certain cells within larger veins (v). Scale bar is 23.71  $\mu$ m.

# Supplemental 3

**A**

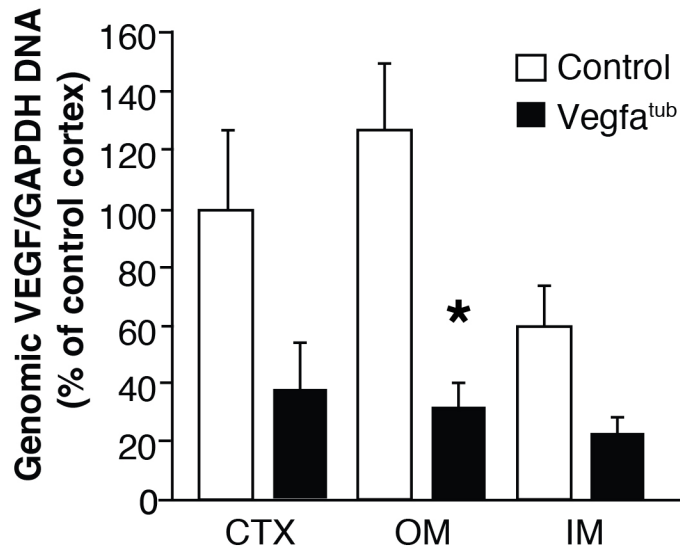

**B**

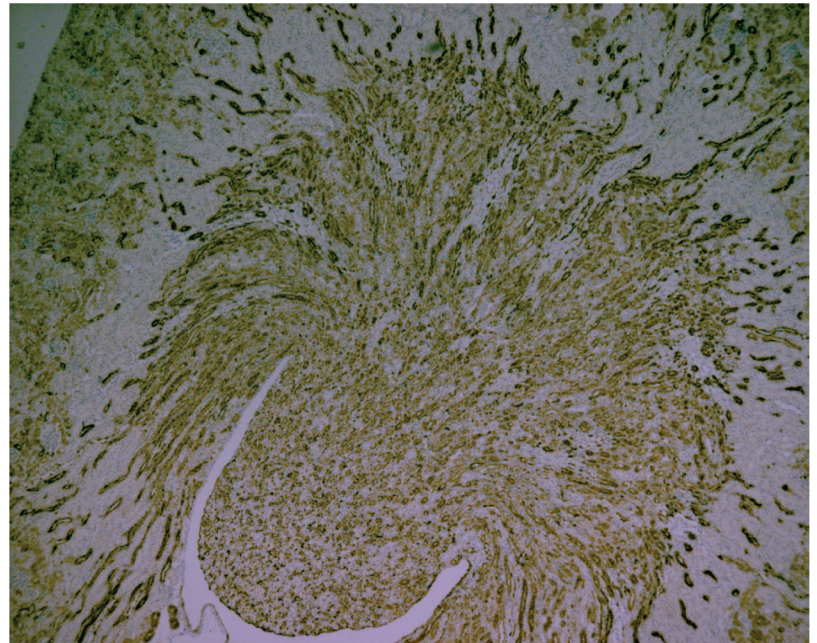

**A)** Abundance of genomic Vegfa in kidney zones of Vegfa<sup>tub</sup> mice and littermate controls (n=5-7). **B)** Representative picture of eGFP staining in a 5 week old Pax8-rtTA;Tet-O-Cre;Z/EG mouse induced by doxycycline from embryonic day 0. Cre-mediated excision drives expression of eGFP.

# Supplemental 4

**A**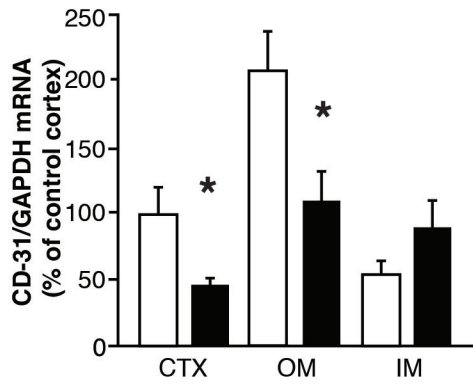**B**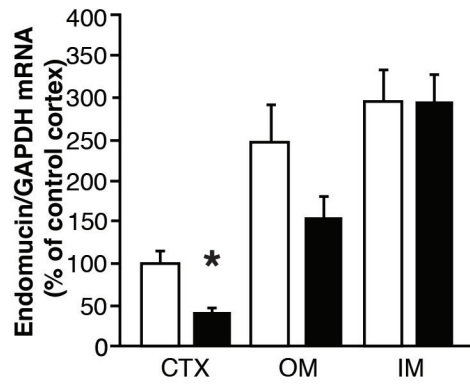**C**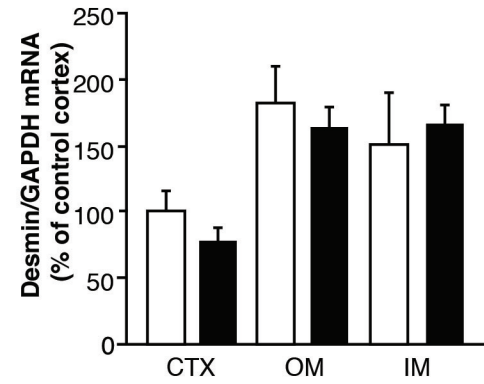**D**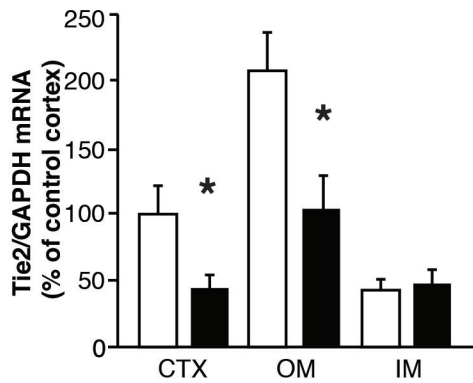**E**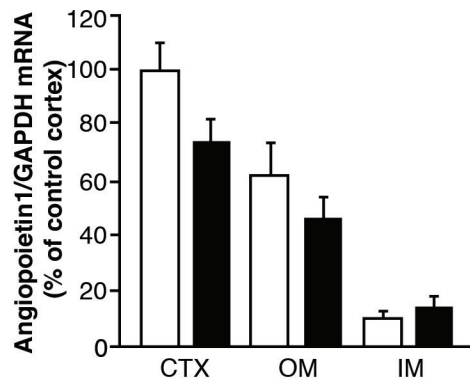**F**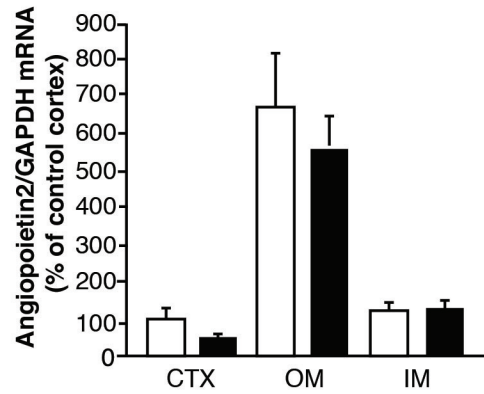**G****Desmin**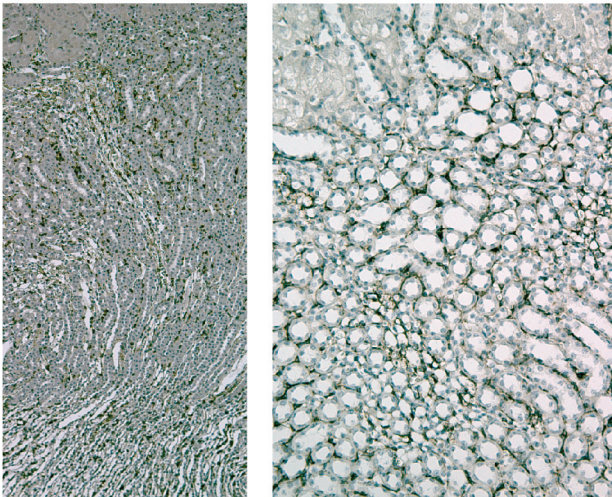

**A-F)** Renal mRNA abundance of CD-31 (PECAM, A), Endomucin (B), Desmin (C), Tie2 (D), Angiopoietin1 (E), and Angiopoietin2 (F) in kidney zones of Vegfa<sup>tub</sup> mice and littermate controls (n=7-11). **G)** Desmin staining in kidney, no difference was noted between groups (n<6) (original magnification x100 and x200, respectively)

# Supplemental 5

A

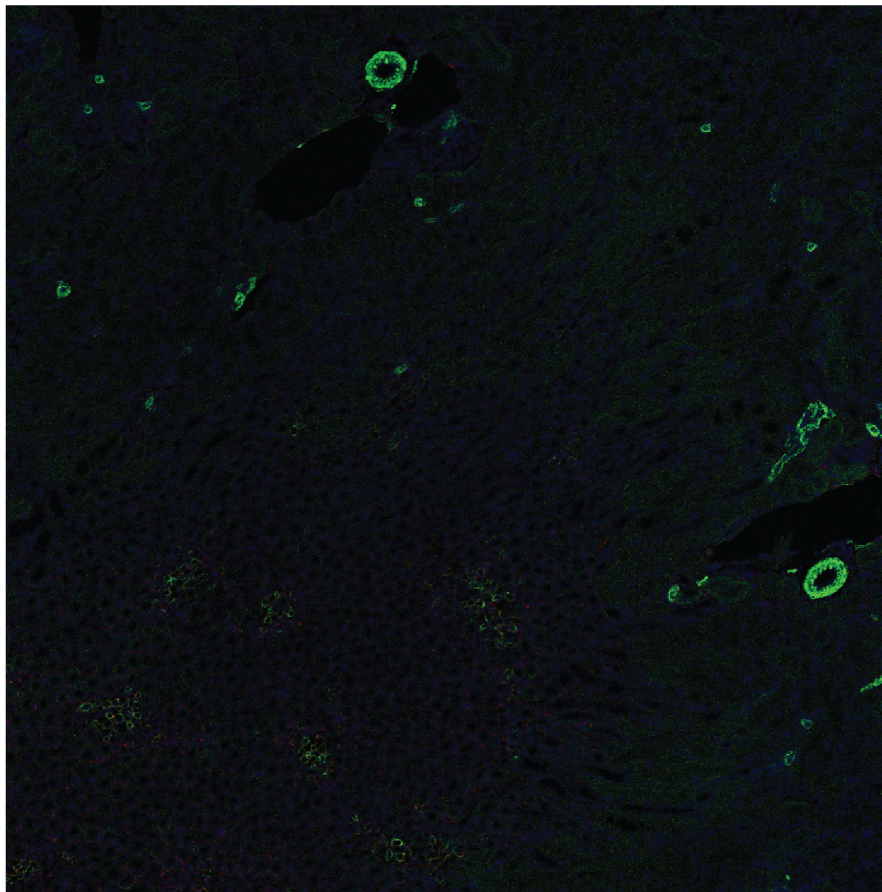

B

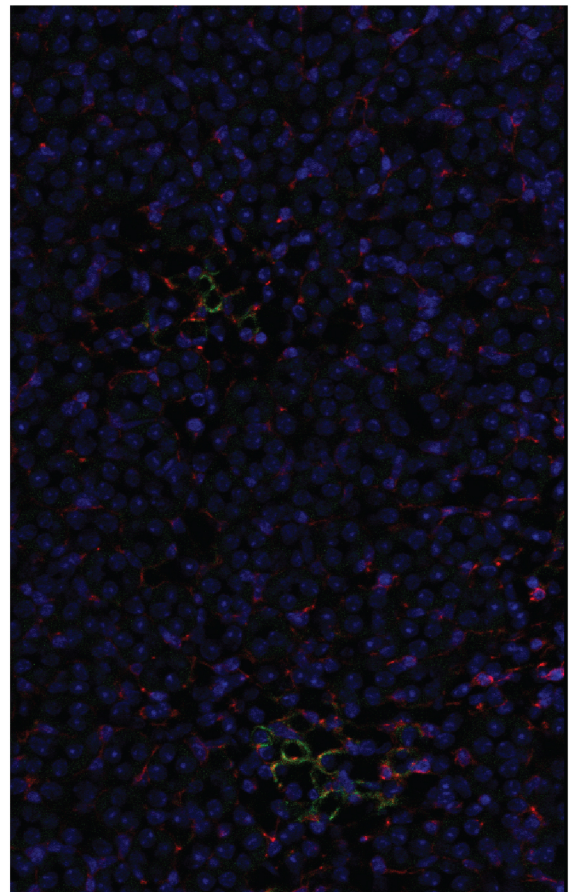

C

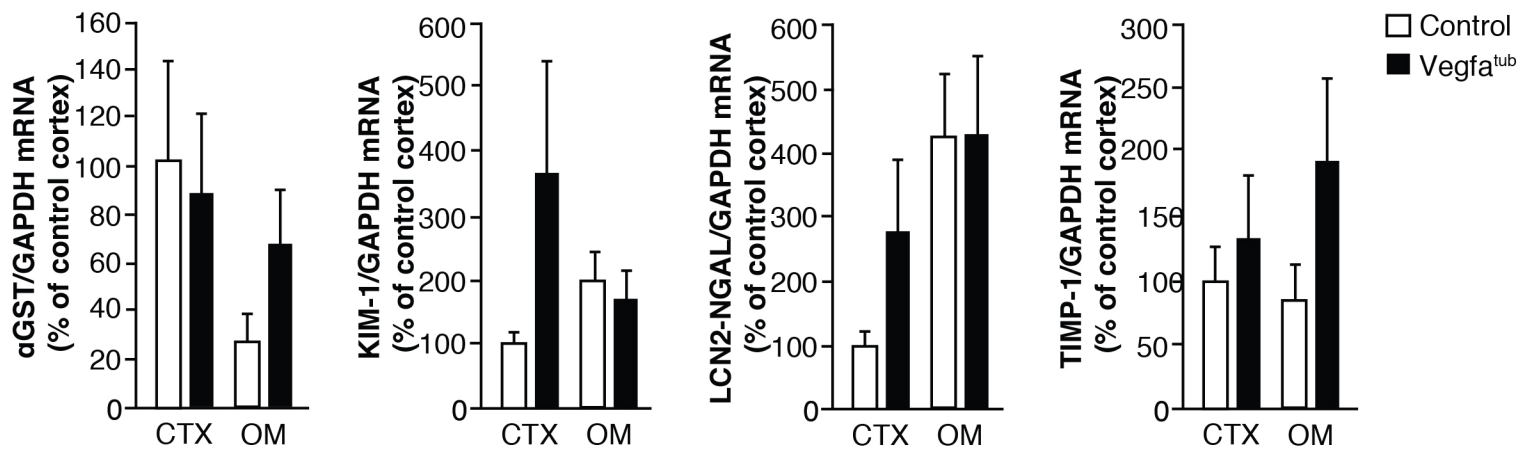

**A-B)** Representative picture of  $\alpha$ -smooth muscle actin (green), Desmin (red), and DAPI (blue) in kidneys of control mice. Staining of  $\alpha$ -smooth muscle actin is evident in vascular smooth muscle cells in larger vessels (A) as well as specific cells within the vasa recta bundles (A-B). **C)** Renal mRNA abundance renal damage markers, namely Glutathione S-transferase ( $\alpha$ GST), Kidney Injury Molecule-1 (KIM-1), Lipocalin-2 (LCN2) also known as neutrophil gelatinase-associated lipocalin (NGAL), and tissue inhibitors of metalloproteinases (TIMP-1) in kidney zones of Vegfa<sup>tub</sup> mice made with normalized hematocrit and littermate controls (n=7-8).

# Supplemental 6

**A**

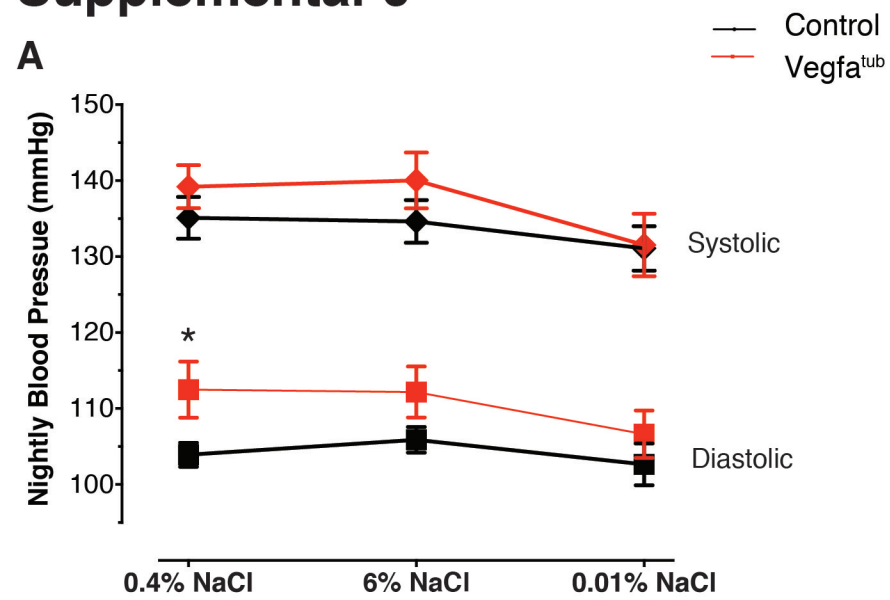

**B**

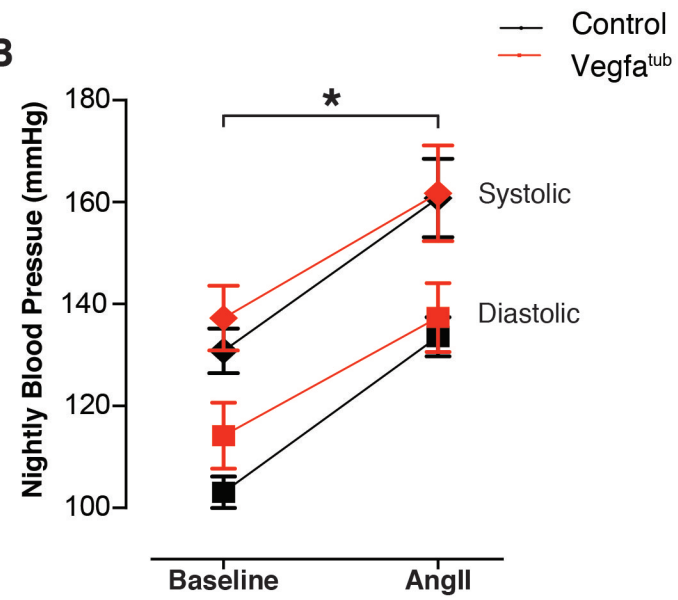

**A)** Effect of high and low dietary NaCl on systolic and diastolic blood pressure between groups (n=5-8). **B)** Effect of angiotensin II infusion on systolic and diastolic pressure in Vegfa<sup>tub</sup> and littermate controls (n=5-8).

**Supplemental figure 7**

| Real-Time PCR                | Forward Primer           | Reverse Primer           |
|------------------------------|--------------------------|--------------------------|
| Gene name                    |                          |                          |
| Vegfa <sup>1</sup>           | CAGGCTGCTGTAACGATGAA     | CTATGTGCTGGCTTTGGTGA     |
| Vegfr2                       | GGCGGTGGTGACAGTATCTT     | GTCAGTACAGAGGCGATGA      |
| CD-31                        | CAAGCAAAGCAGTGAAGCTG     | AGCAGGACAGGTCCAACAAC     |
| Endomucin                    | GCACACACCATGTCAGTCTTC    | CCAGCGCGATAACCACAGGC     |
| Desmin                       | TACACCTGCGAGATTGATGC     | ACATCCAAGGCCATCTTCAC     |
| $\beta$ -actin               | GACATGGAGAAGATCTGGCA     | GGTCTCAAACATGATCTGGGT    |
| HPRT                         | GGCTATAAGTTCTTTGCTGACCTG | AACTTTTATGTCCCCCGTTGA    |
| GAPDH                        | AACTTTGGCATTGTGGAAGG     | TGTGAGGGAGATGCTCAGTG     |
| Slc12a1 F                    | GAGATTGGCGTGGTCATAGTC    | TGCTGCTGATGTTGCCGTC      |
| Epo                          | CATCTGCGACAGTCGAGTTCT    | CACAACCCATCGTGACATTTTC   |
| Tie2 <sup>1</sup>            | TGGAGTCAGCTTGCTCCTTT     | ACCTCCAGTGGATCTTGGTG     |
| Angiopoietin 1 <sup>1</sup>  | GGGGGAGGTTGGACAGTAA      | CATCAGCTCAATCCTCAGC      |
| Angiopoietin 2 <sup>1</sup>  | GATCTTCCTCCAGCCCCTAC     | TTTGTGCTGCTGTCTGGTTC     |
| Vegfa 120 <sup>2</sup>       | GCGGATCAAACCTCACCAA      | CTCGGCTTGTCACATTTTC      |
| Vegfa 164 <sup>2</sup>       | ACAGGACAAAGCCAGAAAAACAC  | GTTTAACTCAAGCTGCCTCGCCT  |
| Vegfa 188 <sup>2</sup>       | GCGGATCAAACCTCACCAA      | GAACAAGGCTCACAGTGAACGC   |
| Vegfa (genomic)              | CCTGGCCCTCAAGTACACCTT    | TCCGTACGACGCATTTCTAG     |
| GAPDH (genomic) <sup>3</sup> | CCCAGCAAGGACACTGAGCAAGAG | ATGGGGGTCTGGGATGGAAATTGT |

| Genotyping                           | Forward Primer          | Reverse Primer          |
|--------------------------------------|-------------------------|-------------------------|
| Name                                 |                         |                         |
| Vegfa-flox <sup>4</sup>              | CCTGGCCCTCAAGTACACCTT   | TCCGTACGACGCATTTCTAG    |
| Pax8-rtTA                            | CGTAGGAAAGCTGCGAGTGT    | AGTGGGTATGATGCCTGTCC    |
| Cre                                  | GTTTCGAAGAACCTGATGCACA  | CTAGAGCCTGTTTTGCACGTTT  |
| Vegfr2 <sup>eGFP</sup>               | CTGTGTCCCGCAGCCGGATA    | CTTGAAGAAGTCGTGCTGCTT   |
| Vegfa <sup>(lacZ)</sup> <sup>5</sup> | TGGCGATTTAGCAGCAGATA    | GGTAGGGGTTTTTCACAGAC    |
| GFP                                  | GCGACGTAAACGGCCACAAGTTC | AGTCCGGACTTGTACAGCTCGTC |

Primers used for real-time semi-quantitative PCR analysis and genotyping.

## References

1. Jeansson M, Gawlik A, Anderson G, Li C, Kerjaschki D, Henkelman M and Quaggin SE. Angiopoietin-1 is essential in mouse vasculature during development and in response to injury. *The Journal of clinical investigation*. 2011;121:2278-2289.
2. Catena R, Muniz-Medina V, Moralejo B, Javierre B, Best CJ, Emmert-Buck MR, Green JE, Baker CC and Calvo A. Increased expression of VEGF121/VEGF165-189 ratio results in a significant enhancement of human prostate tumor angiogenesis. *International journal of cancer Journal international du cancer*. 2007;120:2096-109.
3. Bisson N, Ruston J, Jeansson M, Vanderlaan R, Hardy WR, Du J, Hussein SM, Coward RJ, Quaggin SE and Pawson T. The adaptor protein Grb2 is not essential for the establishment of the glomerular filtration barrier. *PloS one*. 2012;7:e50996.
4. Gerber HP, Hillan KJ, Ryan AM, Kowalski J, Keller GA, Rangell L, Wright BD, Radtke F, Aguet M and Ferrara N. VEGF is required for growth and survival in neonatal mice. *Development*. 1999;126:1149-59.
5. Miquerol L, Langille BL and Nagy A. Embryonic development is disrupted by modest increases in vascular endothelial growth factor gene expression. *Development*. 2000;127:3941-6.



## Supplemental figure 8

| Target epitope                | Species (id)      | Source                                           |
|-------------------------------|-------------------|--------------------------------------------------|
| Aquaporin 2                   | Rabbit (H7661 AP) | Characterized by Dimke <i>et al</i> <sup>1</sup> |
| Beta-Actin                    | Rabbit (ab8227)   | Abcam, Toronto, Canada                           |
| CD34                          | Rat (ab8158)      | Abcam, Cambridge,UK                              |
| Desmin                        | Rabbit (ab15200)  | Abcam, Toronto, Canada                           |
| Endomucin                     | Rat (ab106100)    | Abcam, Toronto, Canada                           |
| GFP                           | Chicken (ab13970) | Abcam, Toronto, Canada                           |
| GFP                           | Rabbit (A6455)    | Invitrogen, Burlington, Canada                   |
| Nkcc2                         | Rabbit (NKCC21-A) | Alpha Diagnostics, San Antonio, TX, USA          |
| $\alpha$ -Smooth Muscle Actin | Mouse (F2777)     | Sigma-Aldrich, Oakville, ON, Canada              |

Antibodies used for immunohistochemical and western blot analysis

### References

1. Dimke H, Flyvbjerg A, Bourgeois S, Thomsen K, Frokiaer J, Houillier P, Nielsen S, Frische S. Acute growth hormone administration induces antidiuretic and antinatriuretic effects and increases phosphorylation of nkcc2. *American journal of physiology. Renal physiology*. 2007;292:F723-735
